1  
2  
3  
4  
5  
6  
7  
8  
9  
10  
11  
12  
13  
14  
15  
16  
17  
18  
19  
20  
21  
22  
23  
24  
25  
26  
27  
28  
29  
30  
31  
32  
33

## Title Page

# Deep learning based models to study the effect of glaucoma genes on angle dysgenesis in-vivo

Authors: Viney Gupta <sup>\*#1</sup>, M.D., Shweta Birla <sup>#2</sup>, Ph.D., Toshit Varshney <sup>1</sup>, M.D., Bindu I Somarajan <sup>1</sup> Ph.D., Shikha Gupta <sup>1</sup>, M.D., Mrinalini Gupta <sup>3</sup> BSc, Karthikeyan Mahalingam <sup>1</sup>, M.D, Abhishek Singh <sup>1</sup>, B.Optom., Dinesh Gupta, <sup>\*2</sup> Ph.D.

### ***Author Affiliation:***

<sup>1</sup> Dr. Rajendra Prasad centre for Ophthalmic Sciences, All India Institute of Medical Sciences (AIIMS), New Delhi, India

<sup>2</sup> International Centre for Genetic Engineering & Biotechnology (ICGEB), India

<sup>3</sup> Technical University of Munich. Munich, Germany.

# *Both share first authorship*

\* *Both are corresponding authors*

### ***Corresponding Authors-***

1. Dr. Dinesh Gupta

Translational Bioinformatics Group

ICGEB, New Delhi, India

Email: dinesh@icgeb.res.in

2. Prof. Viney Gupta

Dr Rajendra Prasad Centre for Ophthalmic Sciences

All India Institute of Medical Sciences

NEW DELHI

INDIA-110029

Email: Gupta\_v20032000@yahoo.com

**Running head:** Genotype and angle dysgenesis in Glaucoma.

34

35 **Conflict of Interest:** There is no conflict of Interest among any of the authors.

36 **Data availability:** All the deep learning codes can be made available upon request.

37 **Author approval:** All authors have seen and approved the manuscript.

38 **Keywords:** angle dysgenesis, goniodysgenesis, Schlemm’s canal, glaucoma, deep learning

39 **Abbreviations and acronyms used**

40 AI-Artificial Intelligence

41 ML-Machine Learning

42 DL- Deep learning

43 SC- Schlemm’s canal

44 SD-OCT- Spectral domain–optical coherence tomography

45 PCG-Primary congenital glaucoma

46 JOAG-Juvenile-onset open angle glaucoma

47 POAG-Adult-onset primary open angle glaucoma

48 TM-Trabecular meshwork

49 ICA-Iridiocular angle

50 IOP-Intraocular pressure

51 ASOCT-Anterior Segment Optical Coherence Tomography

52 ADoA-Angle Dysgenesis from the ASOCT

53 AUROC-Area under receiver operating characteristic curve

54

55

56

57

58

59

60

61

62

63

64

65

66 **Abstract**

67 **Objective:** To predict the presence of Angle Dysgenesis on Anterior Segment Optical  
68 Coherence Tomography (ADoA) using deep learning and to correlate ADoA with mutations  
69 in known glaucoma genes.

70 **Design:** A cross-sectional observational study.

71 **Participants:** Eight hundred, high definition anterior segment optical coherence tomography  
72 (ASOCT) B-scans were included, out of which 340 images (One scan per eye) were used to  
73 build the machine learning (ML) model and the rest were used for validation of ADoA. Out  
74 of 340 images, 170 scans included PCG (n=27), JOAG (n=86) and POAG (n=57) eyes and  
75 the rest were controls. The genetic validation dataset consisted of another 393 images of  
76 patients with known mutations compared with 320 images of healthy controls

77 **Methods:** ADoA was defined as the absence of Schlemm's canal(SC), the presence of  
78 extensive hyper-reflectivity over the region of trabecular meshwork or a hyper-reflective  
79 membrane (HM) over the region of the trabecular meshwork. Deep learning was used to  
80 classify a given ASOCT image as either having angle dysgenesis or not. ADoA was then  
81 specifically looked for, on ASOCT images of patients with mutations in the known genes for  
82 glaucoma (*MYOC*, *CYP11B1*, *FOXC1* and *LTBP2*).

83 **Main Outcome measures:** Using Deep learning to identify ADoA in patients with known  
84 gene mutations.

85 **Results:** Our three optimized deep learning models showed an accuracy > 95%, specificity  
86 >97% and sensitivity >96% in detecting angle dysgenesis on ASOCT in the internal test  
87 dataset. The area under receiver operating characteristic (AUROC) curve, based on the  
88 external validation cohort were 0.91 (95% CI, 0.88 to 0.95), 0.80 (95% CI, 0.75 to 0.86) and  
89 0.86 (95% CI, 0.80 to 0.91) for the three models. Amongst the patients with known gene  
90 mutations, ADoA was observed among all the patients with *MYOC* mutations, as it was also  
91 observed among those with *CYP11B1*, *FOXC1* and with *LTBP2* mutations compared to only  
92 5% of those healthy controls (with no glaucoma mutations).

93 **Conclusions:** Three deep learning models were developed for a consensus-based outcome to  
94 objectively identify ADoA among glaucoma patients. All patients with *MYOC* mutations had  
95 ADoA as predicted by the models.

96

97 **Introduction**

98 Anterior segment Spectral domain–optical coherence tomography (SD-OCT) is being  
99 increasingly used in glaucoma patients, primarily to investigate the anterior chamber angle  
100 and visualize the trabecular meshwork (TM) and Schlemm’s canal (SC) in vivo.<sup>1-4</sup> This in  
101 vivo imaging of anterior chamber angle with ASOCT has been used to detect gross features  
102 of angle dysgenesis in primary congenital glaucoma (PCG), juvenile onset open angle  
103 glaucoma (JOAG) and adult onset primary open angle glaucoma (POAG), which has been  
104 described either as an absence of SC and/or the presence of abnormal tissue or a hyper-  
105 reflective membrane within angle recess.<sup>5-8</sup> These studies have shown that angle dysgenesis  
106 on ASOCT (ADoA), can be observed even in eyes with gonioscopically normal appearing  
107 angles. Primary congenital glaucoma, JOAG and adult onset POAG form a spectrum in terms  
108 of severity of angle dysgenesis. While most of the PCG eyes have features of ADoA, the  
109 same are present only in 40% of JOAG eyes and in up to 35% of adult onset POAG.<sup>6,8</sup> Since  
110 there exists a wide spectrum of anatomical variability of the drainage angle, the TM and SC  
111 morphology in normal eyes<sup>6-8</sup> which can make it difficult to distinguish normal from  
112 abnormal, therefore, interpretation of ASOCT images requires expertise and a deep  
113 understanding of the complexity involved in the developmental anomalies of the outflow  
114 pathways. But the number of human experts to infer images and refer patients for specialised  
115 care is limited and does not match the extensive number of ASOCT imaging now being  
116 routinely done.

117

118 Artificial intelligence (AI) has the potential to assist experts in disease diagnosis, progression  
119 and management by performing rapid image classification, which otherwise is a difficult or  
120 ambiguous scenario for human experts. Deep learning (DL), a subtype of AI, uses the  
121 concept of biological neural networks and has demonstrated convincing results in ophthalmic  
122 diseases.<sup>9-11</sup>

123

124 While angle dysgenesis is associated with developmental immaturity of the outflow pathways  
125 regulated by genes, this could only be ascertained with the help of histopathological studies.  
126 Mutations in some of the commonly associated genes with glaucoma, namely *CYP1B1*<sup>12</sup>,  
127 *FOXC1*<sup>13</sup>, *PITX2*<sup>14</sup>, and *TEK*<sup>15</sup> have been shown to be associated with developmental  
128 abnormalities in the outflow pathways in experimental studies. The severity of angle  
129 dysgenesis has been correlated on histopathology with certain *CYP1B1* gene mutations in

130 PCG patients.<sup>16</sup> Though *MYOC* mutations are known to be associated with early onset  
131 glaucoma of PCG<sup>17-19</sup> and JOAG<sup>20-24</sup> no studies have shown the involvement of *MYOC*  
132 mutations in causing angle dysgenesis. Histopathological studies for angle dysgenesis in  
133 human glaucomatous eyes are difficult to perform and are inherently associated with tissue  
134 handling artefacts. While grossly identifiable features of ADoA have been described  
135 before,<sup>6,8</sup> many subtle changes may also be present on ASOCT scans which are challenging  
136 to detect or precisely quantify by human observers. This study was undertaken to identify  
137 angle dysgenesis with the help of AI and use it to predict the presence and absence of ADoA  
138 among patients with known gene mutations.

## 139 **Material and methods**

### 140 *Dataset details and study design*

141 The study adhered to the tenets of the declaration of Helsinki and was approved by the  
142 Institutional Ethics Committee. An informed consent to participate was taken from all cases  
143 and healthy subjects. A detailed history was recorded and all subjects underwent a thorough  
144 clinical examination.

### 145 *Inclusion criteria:*

146 Normal eyes: Healthy subjects (age > 10years), who had IOP in the normal range,  
147 gonioscopically normal open angle and no other ocular pathology on detailed ophthalmic  
148 evaluation.

149 PCG: These were unrelated cases of PCG with enlarged corneal diameters (>12 mm) who  
150 had baseline IOP records of >22 mm Hg detected before 3 years of age and were now old  
151 enough (>10 years of age) to cooperate for anterior segment OCT scanning.

152 JOAG: These were unrelated primary open angle glaucoma patients diagnosed between 10  
153 and 40 years of age.

154 Adult-Onset POAG: These were unrelated cases of POAG diagnosed after the age of 40 years  
155 with untreated IOP >22 mm Hg in one or both the eyes on more than two occasions, open  
156 angle on gonioscopy in both eyes, and glaucomatous optic neuropathy in one or both eyes  
157 with visual field loss consistent with optic nerve damage.

158 Only those patients who had been treated and had an IOP < 22 mmHg at the time of imaging  
159 were included.

### 160 *Exclusion criteria:*

161 Patients excluded from the study: those with a history of steroid use, presence of any other  
162 retinal or neurologic pathology, evidence of secondary causes of raised IOP such as pigment  
163 dispersion, pseudoexfoliation, or trauma, those with any pathology detected on gonioscopy

164 such as angle recession, pigmentation of the angle greater than grade 3, irido trabecular  
165 contact or peripheral anterior synechiae, and patients with nystagmus/and or poor fixation  
166 were excluded.

#### 167 *SD-OCT examination:*

168 The OCT examination was performed using the Spectralis OCT (software version 6.5;  
169 Heidelberg Engineering GmbH, Heidelberg, Germany). This machine uses an 880-nm  
170 wavelength and provides a resolution of 3.5  $\mu\text{m}$  (digital) to 7  $\mu\text{m}$  (optical) at 40 kHz. An  
171 anterior segment lens was used. Only those images that were considered good quality were  
172 included. ASOCT B-scans from nasal/temporal quadrant were selected per eye and these  
173 images were analyzed by 2 blinded observers for presence or absence of ADoA, which were  
174 then subsequently used for machine learning. A total of 800 ASOCT B-scans were included,  
175 out of which 340 images (1 B-scan per eye) were used to build the ML model and the rest  
176 were used for validation. Out of 340 images, 170 scans included PCG (n=27), JOAG (n=86)  
177 and POAG (n=57) eyes and the rest were healthy controls.

#### 178 *Data preprocessing*

179 **Figure 1** summarizes the workflow used in the study. The images were encoded by removing  
180 patient details and giving unique reference numbers. Each image was cropped manually in  
181 two ways to extract the iridocorneal angle (ICA) area and a trabecular meshwork (TM) area  
182 by a single observer. For this study, the ICA area was defined as 1100 x 900 pixels  $\pm$  10%  
183 (1210 x 990 $\mu\text{m}$ ) rectangular area including the region covering TM, SC, a part of cornea in  
184 continuation with a part of sclera and iris. The images were further cropped to get a TM area  
185 defined as 600 x 400 pixels  $\pm$  10% (660 x 440  $\mu\text{m}$ ), including SC, scleral spur, and TM  
186 region (**Figure 2**).

#### 187 *Model training and evaluation*

188 *Augmentation technique and the technology used are provided in Supplemental information 1*

189 The two datasets (ICA area and TM area images), each having 8160 images, were randomly  
190 split into training (n=7996) and testing (n=164) subsets with a ratio of 98:2 (**Supplemental**  
191 **Fig 1**). The applied split ratio was considered so that the maximum number of images could  
192 be used for model training. The test set was used only for the final evaluation of the model  
193 performance and none of the images in the test set were used for training.

194 We applied the transfer learning method to classify a given SD-OCT image as either having a  
195 normal angle or angle dysgenesis. In MATLAB all the available 19 pre-trained convolutional  
196 neural network (CNN) models including SqueezeNet, ResNet-18, GoogleNet, ResNet-50,  
197 DarkNet-53, DarkNet-19, ShuffleNet, NasnetMobile, Nasnet Large, Xception, Place-365-

198 Google, Mobilenet V2, DenseNet-201, Inception-Resnet V2, Inception-V3, ResNet-101,  
199 VGG-19, VGG-16 and AlexNet were trained using our datasets. The first input layer and last  
200 output layer with the soft-max activation function in the models were replaced for the binary  
201 classification between angle dysgenesis and normal angle. All the images were resized to the  
202 required pixels depending upon the CNN model being trained. Initially, all the models were  
203 trained using the default parameters and the most efficient ones were prioritised. The  
204 hyperparameters of the prioritised models were further tuned in a stochastic gradient descent  
205 manner (SGDM) based on minimization of mean squared error with the combinations of  
206 different batch sizes, epochs, learning rates, momentum and drop factor.

207 To get the robust models, different groupings of 23 augmented images were also evaluated  
208 along with models with single augmented images and models with all combined augmented  
209 images. Finally, 74 models were developed using varied hyper-parameters and augmented  
210 images combinations. Prediction quality was assessed by overall accuracy, specificity,  
211 sensitivity, area under the ROC curve and comparison with the image annotations of the two  
212 experts.

213 *Genetic correlation with ADoA:* Thirty unrelated patients with open angle glaucoma  
214 diagnosed between 10 to 40 years of age, who had undergone Whole Exome Sequencing  
215 (WES) followed by a bioinformatics analysis ( *provided in Supplemental information*) and  
216 had been found to harbour a mutation (that was pathogenic) in a known glaucoma gene,  
217 underwent ASOCT. The DL models were applied to detect ADoA.

#### 218 *Validation of DL predictions*

219 Validations of the final DL models were performed using the following types of independent  
220 datasets (**Supplemental Fig 1**). a) An independent external validation dataset of 67 images,  
221 b) A comparative validation between the model prediction and human experts where two  
222 glaucoma specialists (with more than 20 years' experience) masked to details of the patients,  
223 evaluated the SD-OCT scans (n=73) and their results compared with the final model  
224 prediction and c) A genetics validation dataset consisted of 393 images of patients with  
225 known mutations and 320 images of healthy controls without any glaucoma gene mutation.  
226 This was a blind check validation where the results of the molecular analysis were blinded  
227 from the AI experts.

#### 228 *Statistical analysis*

229 To compare the outcomes from the validation studies, statistical analyses were performed  
230 using a statistical software package (SPSS v. 26.0; SPSS, Inc., Chicago, IL, USA). To  
231 determine the agreement between the specialists and DL prediction, Cohen's  $\kappa$  test was

232 applied. The Receiver Operating Characteristic (ROC) analysis was performed for the  
233 external validation dataset and area under ROC (AUROC) curve was determined for  
234 comparisons.

235



## 236 **Results**

237 **Table1** shows the clinical and demographic characteristics of the study subjects.

238 Using transfer learning on two approaches as mentioned below, we built a consensus-based  
239 algorithm consisting of the three best models for differentiating angle dysgenesis from the  
240 normal angle. The performance measures of these models are given in **Supplemental**  
241 **Table1**.

242 The first approach uses the iridocorneal angle area dataset to train all the 19 CNN models  
243 (**Figure 1**). The most efficient model was built using Inception-ResnetV2, a 164 layers deep  
244 convolutional neural network previously trained on more than a million images.<sup>25</sup> All the  
245 images were rescaled to 299x299 pixels as the input image pre-requisite of Inception-  
246 ResnetV2 and finally utilizes SGDM optimiser with a learning rate of 0.005, 45 epochs, and  
247 mini-batch size of 64 after hyper parameters optimisation (**Supplemental Table1**). The  
248 model achieved the accuracy, sensitivity and specificity on the internal test dataset of 97.56%,  
249 96.4% and 98.7%, respectively.

250 The second approach uses the TM area and the two best models were trained using Inception-  
251 ResnetV2<sup>25</sup> and Mobilenetv2<sup>26</sup> neural networks. The mobilenetv2 is a convolutional neural  
252 network that requires an input image of 229x229 pixels. Using the TM area test images, the  
253 models achieved an accuracy of 98.17% and 98.78%, with a sensitivity of 97% and 98.7%, a  
254 specificity of 98.7% in each of the cases, respectively (**Supplemental Table1**). The  
255 consensus based outcome from the three CNN transfer learning models is the final predicted  
256 classification which could recognise pixel patterns corresponding to the abnormalities at the  
257 angle, helping in better classification among the glaucoma group and controls.

### 258 *External Validation dataset*

259 To further evaluate the accuracy and reproducibility of our models, we tested them on an  
260 independent external validation dataset consisting of 67 images. The models trained with the  
261 combined augmented and the original images exhibited lower accuracy than those trained on  
262 original images alone. So we did not proceed with the augmented images and all the  
263 validation studies were carried using original images only. Model 1 had the best accuracy and  
264 specificity but the lowest sensitivity, while the other two models showed good sensitivity and  
265 comparable accuracies (**Supplemental Table1**). The consensus-based outcome ensures  
266 inclusiveness of the mandatory training features after trade-off and reaching one outcome.  
267 The area under the ROC curves were >0.80 for all the three models indicating good  
268 performances of the models in detecting ADoA (**Figure 3**).

269

270 *Comparison of the Models performance with Human Experts*

271 The comparative prediction analysis is summarised in **Table 2**. The consensus-based result  
272 achieved a maximum accuracy of 83%, reiterating the importance of consensus-based  
273 decision-making in clinical settings. To determine the agreement between the expert's  
274 decision and consensus-based prediction, Cohen's Kappa test was carried out between  
275 expert1-model prediction, expert2-model prediction and expert1-expert2 prediction. There  
276 was a good agreement between the expert1-model prediction ( $\kappa = .619$ ,  $p < 0.05$ ), which is  
277 indicative of a similarity between the well experienced expert's decision and consensus-based  
278 model prediction (**Table 3**).

279 *Genetic validation dataset*

280 Out of 30 (unrelated) patients, who had known gene mutations, 16 had *MYOC* mutations, 10  
281 had *CYP1B1*, 2 had *FOXC1* and 2 had *LTBP2* mutation. The detailed genotype of these  
282 patients is provided in **Table 4**. These 30 patients had 16 different mutations, all except three  
283 (that were frameshift) were missense. All mutations except one in *CYP1B1* gene  
284 (p.Arg368His) were heterozygous.

285 Among these patients, angle dysgenesis on ASOCT was observed as determined by AI,  
286 among all patients with known gene mutations. Maximum number of scans showing ADoA  
287 were observed with *MYOC* p.Pro370Leuc and p.Gln48His, with *CYP1B1* p.Asn519ser and  
288 p.Arg368His and with *LTBP2* frameshift (p.Val801Hisfs\*18) and p.Pro229Thr mutation.  
289 Gonioscopically angle dysgenesis was not seen among any of the *MYOC* patients. However,  
290 features of angle dysgenesis were seen both on gonioscopy and on ASOCT among those with  
291 *CYP1B1*, *FOXC1* and *LTBP2* mutation.

292 Overall, AI was predictive of angle dysgenesis in 81% scans among *MYOC* positive patients,  
293 89% *CYP1B1* patients, 85% *FOXC1* and 96% among those with *LTBP2* mutation on an  
294 average.

295 **Figure 4** shows images of patients with known gene mutations predicted to have angle  
296 dysgenesis on AI Modelling. While *CYP1B1* and *LTBP2* were seen to primarily affect SC  
297 morphology, the *MYOC* and *FOXC1* mutations were found to be associated with  
298 morphological variations in the TM, since the SC was visualised on most scans. The age of  
299 onset of glaucoma did not correlate with the extent of angle dysgenesis.

300

301

302

303

304

## 305 **Discussion**

306 This study used deep learning to build models that identify ADoA among open-angle  
307 glaucoma patients. We hypothesised that the angle dysgenesis, exhibited as disturbances in  
308 the extracellular matrix of TM, SC and adjoining regions in open angle glaucoma patients,  
309 could be reflected as pixel changes (as they occur on histopathological sections) and the DL  
310 based models can identify these pixel variations classifying the iridocorneal angle as having  
311 dysgenesis or not, based on SD-OCT scans. In the present study, SD-OCT scans of normal,  
312 PCG, JOAG and POAG eyes were used to develop a robust deep learning based model by  
313 using an image-to-classification approach. In a subset of these patients, ADoA was correlated  
314 with known gene mutations.

315 High definition ASOCT can pick up anomalies in SC development and TM morphology,  
316 which are not visible on enface gonioscopy. Gonioscopy and goniophotography also require  
317 much expertise and remain observer-dependent. Also sometimes what appears to be a normal  
318 open angle may be harbouring dysgenesis in the form of an impermeable hyper reflective  
319 membrane that may be visible only on an ASOCT.<sup>8</sup> While ASOCT has been used for  
320 identifying angle closure, it would be of use even in patients with POAG in identifying  
321 ADoA, and thus to decide the role of angle based surgeries.<sup>8</sup>

322 In the present study, three deep learning based models were developed for a consensus based  
323 outcome to predict the presence of ADoA among open angle glaucoma patients. Out of all the  
324 19 transfer learning algorithms used in model building, inception resnetv2 and mobilenetv2  
325 achieved superior performances on the ICA area and TM. Whether an eye has angle  
326 dysgenesis or not was predicted with greater than 95% accuracy in the internal dataset and  
327 more than 80% accuracy in the two different external validation datasets used in the present  
328 study.

329 Considering the phenotypic, genotypic and histopathological complexity in open angle  
330 glaucoma, DL has been implemented using different approaches.<sup>27-30,30,31</sup> Studies have  
331 evaluated the potential of implementing DL in primary angle closure disease and have shown  
332 promising results.<sup>32,33</sup> While the SD-OCT scans can successfully capture the anterior angle at  
333 high resolution, they may fail to identify angle dysgenesis in cases where altered extracellular  
334 matrix anomalies are subtle enough to get unnoticed by human eyes. While identifying gross  
335 dysgenesis of the angle, as in PCG may be easier<sup>34</sup>, subtle angle anomalies as in JOAG or  
336 POAG are more challenging to identify. The biological changes in the extracellular matrix  
337 (ECM) comprising of the trabecular drainage pathways that lead to IOP elevation need to be

338 identified in vivo.<sup>35,36</sup> With the DL models used in the present study, we could pick up these  
339 subtle ECM changes in the TM along with abnormalities in the SC morphology.

340 Deep learning requires an enormous number of annotated training data, which is challenging  
341 to obtain in rare disorders<sup>37</sup>, however, transfer learning and augmentation techniques are  
342 effective strategies to be used in cases with limited dataset.<sup>38</sup> Transfer learning is a special  
343 case in which a CNN based DL model trained on one type of dataset or domain is re-  
344 purposed on another dataset. Transfer Learning demonstrates compelling results, particularly  
345 in cases where the data available for building the models is limited.<sup>11, 38</sup> In the present study,  
346 19 types of different CNN algorithms were trained, with each image in the training dataset  
347 augmented in 23 different ways. This increased the numbers of images in the training dataset  
348 and assured that the model was trained on various images, making it more robust and reliable  
349 to be used in clinical settings. The robustness was also evident because the prediction for  
350 external dataset images displayed better results in their original form than with  
351 augmentations. This indicates that in natural settings, apart from pixel changes, no query  
352 image augmentation is required.

353 We looked for any pattern between the DL predictions of ADoA and specific gene mutations.  
354 In all the mutation positive patients, ADoA could be detected in over 80% of images. This  
355 was in contrast to only 5% of the normal images deemed as having ADoA. Most gene  
356 mutation studies on animal models of glaucoma have provided insights into the pathogenesis  
357 of outflow channels in controlled experiments, on the other hand, in-vivo analyses of human  
358 eyes with rare disease-causing mutations provides a better understanding of the anatomical  
359 effects of these mutations. While the mutations in the *MYOC* gene are known to cause  
360 aggregation of the misfolded myocilin protein that, leads to TM cell toxicity and eventually  
361 death, there is no evidence in literature to suggest the role of the *MYOC* gene in the  
362 development of the angle. There is only one histopathological report of a JOAG patient with  
363 *MYOC* Tyr453His mutation, where no apparent changes of the TM or SC were noted though  
364 intense *MYOC* immune-reactivity was observed at the TM<sup>39</sup>. Nevertheless, there is evidence  
365 to suggest that *MYOC* mutations are associated with goniodysgenesis. Cheng X<sup>40</sup> et al.  
366 reported a 3 generation JOAG family with Pro370Leu mutation in the *MYOC* gene in all  
367 affected members who also had goniodysgenesis. This evidence is further strengthened by the  
368 reports of the association of *MYOC* gene mutations with congenital glaucoma.<sup>17-19</sup> In  
369 contrast, *CYP11B1* related cases of PCG have been shown to have histopathological evidence  
370 of goniodysgenesis, involving not only the TM and SC but also the collector channels.<sup>41</sup> In  
371 our study too, the subset of JOAG patients with *CYP11B1* gene mutations showed ADoA as

372 predicted with DL models. We also found *FOXC1* and *LTBP2* mutations among our patients  
373 with no other features of either Axenfeld Reiger Syndrome (ARS) or zonular abnormalities  
374 classically associated with these gene mutations. Two cases of JOAG with *LTBP2* mutations  
375 have been described<sup>42,43</sup>, one by Saeedi et al. and the other, by our group. The *LTBP2* gene  
376 mutations are known to express a wide variety of ocular phenotypes (as with other  
377 monogenic disorders) ranging from primary trabecular meshwork dysgenesis to a Marfans  
378 like zonular disease. While *FOXC1* mutations have been commonly associated with ARS,  
379 they are also known to occur in adult onset POAG and JOAG.<sup>44</sup> In our study, 2 unrelated  
380 patients harboured the same *FOXC1* frameshift mutation which is novel. Our findings  
381 demonstrate that probably different gene mutations affect different parts of the proximal  
382 outflow pathways. While *CYP1B1* and *LTBP2* was found to affect primarily the SC  
383 morphology, the *MYOC* and *FOXC1* were found to be associated with morphological  
384 variations in the TM, since the SC in the latter was normally developed.

385 The present study's limitation is the fewer images in the training dataset (n=340) used for DL  
386 model building. However, we enhanced the input data by using augmentation techniques.  
387 Another limitation of the limited data set was our inability to correlate the gene mutations  
388 with the clinical severity of the disease, which was not within the ambit of our research since  
389 our study was focussed on evaluating the association gene mutations with DL predicted angle  
390 dysgenesis. Many images on ASOCT have to be discarded due to poor quality and image  
391 artefacts at the ICA area due to the reflectance from the superficial vessels. This would be  
392 taken care of, hopefully, in the newer generation machines, which would have better  
393 resolution too. Notwithstanding these limitations, the strength of the study lies in having  
394 addressed a crucial as well as unique issue of in vivo identification of angle dysgenesis using  
395 a very rare dataset of early onset POAG patients.

396 In conclusion, we have built a consensus based DL model to predict the presence or absence  
397 of ADoA. The validation on independent datasets and its correlation with the known gene  
398 mutations has highlighted the translational relevance of the model in clinical settings, as it  
399 could potentially be deployed in screening patients and their family members who could be  
400 picked up if they have angle dysgenesis.

401

402

403

404

405

406

407

408 **References**

- 409 1. Hong J, Xu J, Wei A, et al. Spectral-Domain Optical Coherence Tomographic  
410 Assessment of Schlemm's Canal in Chinese Subjects with Primary Open-angle Glaucoma.  
411 *Ophthalmology*. 2013;120(4):709-715. doi:10.1016/j.ophtha.2012.10.008.
- 412 2. Ang M, Baskaran M, Werkmeister RM, et al. Anterior segment optical coherence  
413 tomography. *Progress in Retinal and Eye Research*. 2018;66:132-156.  
414 doi:10.1016/j.preteyeres.2018.04.002.
- 415 3. Kagemann L, Wollstein G, Ishikawa H, et al. 3D visualization of aqueous humor outflow  
416 structures in-situ in humans. *Exp Eye Res*. 2011;93(3):308-315.  
417 doi:10.1016/j.exer.2011.03.019.
- 418 4. Usui T, Tomidokoro A, Mishima K, et al. Identification of Schlemm's canal and its  
419 surrounding tissues by anterior segment fourier domain optical coherence tomography.  
420 *Invest Ophthalmol Vis Sci*. 2011;52(9):6934-6939. doi:10.1167/iovs.10-7009.
- 421 5. Gould DB, Smith RS, John SWM. Anterior segment development relevant to glaucoma.  
422 *Int J Dev Biol*. 2004;48(8-9):1015-1029. doi:10.1387/ijdb.041865dg.
- 423 6. Gupta V, Chaurasia AK, Gupta S, Gorimanipalli B, Sharma A, Gupta A. In Vivo Analysis  
424 of Angle Dysgenesis in Primary Congenital, Juvenile, and Adult-Onset Open Angle  
425 Glaucoma. *Invest Ophthalmol Vis Sci*. 2017;58(13):6000. doi:10.1167/iovs.17-22695.
- 426 7. Buller C, Johnson D. Segmental variability of the trabecular meshwork in normal and  
427 glaucomatous eyes. *Invest Ophthalmol Vis Sci*. 1994;35(11):3841-3851.
- 428 8. Varshney T, Azmira K, Gupta S, et al. In vivo imaging of the Schlemm's Canal and the  
429 response to Selective laser trabeculoplasty. *American Journal of Ophthalmology*. 2021.  
430 doi:10.1016/j.ajo.2021.07.002.
- 431 9. Gulshan V, Peng L, Coram M, et al. Development and Validation of a Deep Learning  
432 Algorithm for Detection of Diabetic Retinopathy in Retinal Fundus Photographs. *JAMA*.  
433 2016;316(22):2402-2410. doi:10.1001/jama.2016.17216.
- 434 10. Fauw J de, Ledsam JR, Romera-Paredes B, et al. Clinically applicable deep learning for  
435 diagnosis and referral in retinal disease. *Nat Med*. 2018;24(9):1342-1350.  
436 doi:10.1038/s41591-018-0107-6.
- 437 11. Kermany DS, Goldbaum M, Cai W, et al. Identifying Medical Diagnoses and Treatable  
438 Diseases by Image-Based Deep Learning. *Cell*. 2018;172(5):1122-1131.e9.  
439 doi:10.1016/j.cell.2018.02.010.



- 440 12. Bayat B, Yazdani S, Alavi A, et al. Contributions of MYOC and CYP1B1 mutations to  
441 JOAG. *Mol Vis*. 2008;14:508-517. Published March 13, 2008.
- 442 13. van der Merwe EL, Kidson SH. Wholemount imaging reveals abnormalities of the  
443 aqueous outflow pathway and corneal vascularity in Foxc1 and Bmp4 heterozygous mice.  
444 *Exp Eye Res*. 2016;146:293-303. doi:10.1016/j.exer.2016.04.003.
- 445 14. Ji Y, Buel SM, Amack JD. Mutations in zebrafish pitx2 model congenital malformations  
446 in Axenfeld-Rieger syndrome but do not disrupt left-right placement of visceral organs.  
447 *Dev Biol*. 2016;416(1):69-81. doi:10.1016/j.ydbio.2016.06.010.
- 448 15. Souma T, Tompson SW, Thomson BR, et al. Angiopoietin receptor TEK mutations  
449 underlie primary congenital glaucoma with variable expressivity. *J Clin*  
450 *Invest*;126(7):2575-2587. doi:10.1172/JCI85830.
- 451 16. Hollander DA, Sarfarazi M, Stoilov I, Wood IS, Fredrick DR, Alvarado JA. Genotype and  
452 phenotype correlations in congenital glaucoma: CYP1B1 mutations, goniodysgenesis, and  
453 clinical characteristics. *American Journal of Ophthalmology*. 2006;142(6):993-1004.  
454 doi:10.1016/j.ajo.2006.07.054.
- 455 17. Chen Y, Jiang D, Yu L, et al. CYP1B1 and MYOC mutations in 116 Chinese patients  
456 with primary congenital glaucoma. *Arch Ophthalmol*. 2008;126(10):1443-1447.  
457 doi:10.1001/archophth.126.10.1443.
- 458 18. Kaur K, Reddy ABM, Mukhopadhyay A, et al. Myocilin gene implicated in primary  
459 congenital glaucoma. *Clin Genet*. 2005;67(4):335-340. doi:10.1111/j.1399-  
460 0004.2005.00411.x.
- 461 19. Chakrabarti S, Kaur K, Komatireddy S, et al. Gln48His is the prevalent myocilin mutation  
462 in primary open angle and primary congenital glaucoma phenotypes in India. *Mol Vis*.  
463 2005;11:111-113. Published February 4, 2005.
- 464 20. Braghini CA, Neshich IAP, Neshich G, et al. New mutation in the myocilin gene  
465 segregates with juvenile-onset open-angle glaucoma in a Brazilian family. *Gene*.  
466 2013;523(1):50-57. doi:10.1016/j.gene.2013.02.054.
- 467 21. Bruttini M, Longo I, Frezzotti P, et al. Mutations in the myocilin gene in families with  
468 primary open-angle glaucoma and juvenile open-angle glaucoma. *Arch Ophthalmol*.  
469 2003;121(7):1034-1038. doi:10.1001/archophth.121.7.1034.
- 470 22. Wiggs JL, Allingham RR, Vollrath D, Jones KH, De La Paz M, Kern J, Patterson K, Babb  
471 VL, Del Bono EA, Broomer BW, Pericak-Vance MA, Haines JL. *Prevalence of mutations*  
472 *in TIGR/Myocilin in patients with adult and juvenile primary open-angle glaucoma*. [Am  
473 J Hum Genet]; 1998 Nov;63(5):1549-52. doi: 10.1086/302098.

- 474 23. Yao Y-H, Wang Y-Q, Fang W-F, Zhang L, Yang J-H, Zhu Y-H. A recurrent G367R  
475 mutation in MYOC associated with juvenile open angle glaucoma in a large Chinese  
476 family. *Int J Ophthalmol*. 2018;11(3):369-374. doi:10.18240/ijo.2018.03.04.
- 477 24. Stoilova D, Child A, Brice G, et al. Novel TIGR/MYOC mutations in families with  
478 juvenile onset primary open angle glaucoma. *J Med Genet*. 1998;35(12):989-992.  
479 doi:10.1136/jmg.35.12.989.
- 480 25. C. Szegedy, S. Ioffe, V. Vanhoucke, and A. Alemi. Inception-v4, inception-ResNet and  
481 the impact of residual connections on learning. In *Proceedings of the Thirty-First AAAI*  
482 *Conference on Artificial Intelligence (AAAI'17)*. 2017:4278-4284.
- 483 26. Sandler M, Howard A, Zhu M, Zhmoginov A, Chen L-C. MobileNetV2: Inverted  
484 Residuals and Linear Bottlenecks. In: 2018 IEEE/CVF Conference on Computer Vision  
485 and Pattern Recognition. IEEE; 2018:4510-4520.
- 486 27. Ran AR, Cheung CY, Wang X, et al. Detection of glaucomatous optic neuropathy with  
487 spectral-domain optical coherence tomography: a retrospective training and validation  
488 deep-learning analysis. *Lancet Digit Health*. 2019;1(4):e172-e182. doi:10.1016/S2589-  
489 7500(19)30085-8.
- 490 28. Medeiros FA, Jammal AA, Thompson AC. From Machine to Machine: An OCT-Trained  
491 Deep Learning Algorithm for Objective Quantification of Glaucomatous Damage in  
492 Fundus Photographs. *Ophthalmology*. 2019;126(4):513-521.  
493 doi:10.1016/j.ophtha.2018.12.033.
- 494 29. Yousefi S, Gupta K, Sun J, et al. Novel Genetic Factors Associated with Primary Open-  
495 Angle Glaucoma Identified Using Artificial Intelligence. *Invest Ophthalmol Vis Sci*.  
496 2021;62(8):1491.
- 497 30. Thompson AC, Jammal AA, Medeiros FA. A Deep Learning Algorithm to Quantify  
498 Neuroretinal Rim Loss From Optic Disc Photographs. *American Journal of*  
499 *Ophthalmology*. 2019;201:9-18. doi:10.1016/j.ajo.2019.01.011.
- 500 31. Shuldiner SR, Boland MV, Ramulu PY, et al. Predicting eyes at risk for rapid glaucoma  
501 progression based on an initial visual field test using machine learning. *PLoS One*.  
502 2021;16(4):e0249856. doi:10.1371/journal.pone.0249856.
- 503 32. Xu BY, Chiang M, Chaudhary S, Kulkarni S, Pardeshi AA, Varma R. Deep Learning  
504 Classifiers for Automated Detection of Gonioscopic Angle Closure Based on Anterior  
505 Segment OCT Images. *American Journal of Ophthalmology*. 2019;208:273-280.  
506 doi:10.1016/j.ajo.2019.08.004.



- 507 33. Fu H, Xu Y, Lin S, et al. Angle-Closure Detection in Anterior Segment OCT Based on  
508 Multilevel Deep Network. *IEEE Trans Cybern.* 2020;50(7):3358-3366.  
509 doi:10.1109/TCYB.2019.2897162.
- 510 34. Gupta V, Singh A, Pandya I, et al. Differences in outflow channels between two eyes of  
511 unilateral primary congenital glaucoma. *Acta Ophthalmol.* 2021;99(2):187-194.  
512 doi:10.1111/aos.14540.
- 513 35. Alvarado J, Murphy C, Juster R. Trabecular meshwork cellularity in primary open-angle  
514 glaucoma and nonglaucomatous normals. *Ophthalmology.* 1984;91(6):564-579.  
515 doi:10.1016/s0161-6420(84)34248-8.
- 516 36. Alvarado J, Murphy C, Polansky J, Juster R. Age-related changes in trabecular meshwork  
517 cellularity. *Invest Ophthalmol Vis Sci.* 1981;21(5):714-727. MID.
- 518 37. Altaf F, Islam SMS, Janjua NK. A novel augmented deep transfer learning for  
519 classification of COVID-19 and other thoracic diseases from X-rays. *Neural Comput &*  
520 *Applic.* 2021;33(20):14037-14048. doi:10.1007/s00521-021-06044-0.
- 521 38. Imai S, Kawai S, Nobuhara H. Stepwise PathNet: a layer-by-layer knowledge-selection-  
522 based transfer learning algorithm. *Sci Rep.* 2020;10(1). doi:10.1038/s41598-020-64165-3.
- 523 39. van der Heide, C. J., Alward, W., Flamme-Wiese, M., Riker, M., Syed, N. A., Anderson,  
524 M. G., Carter, K., Kuehn, M. H., Stone, E. M., Mullins, R. F., & Fingert, J. H.  
525 Histochemical Analysis of Glaucoma Caused by a Myocilin Mutation in a Human Donor  
526 Eye. *Ophthalmology. Glaucoma.* 2018;1(2):132-138.
- 527 40. Chen X, Yan N, Yun H, et al. Sequence analysis of MYOC and CYP1B1 in a Chinese  
528 pedigree of juvenile glaucoma with goniodysgenesis. *Mol Vis.* 2009;15:1530-1536.
- 529 41. García-Antón MT, Salazar JJ, Hoz R de, et al. Goniodysgenesis variability and activity of  
530 CYP1B1 genotypes in primary congenital glaucoma. *PLoS One.* 2017;12(4):e0176386.  
531 doi:10.1371/journal.pone.0176386.
- 532 42. Saeedi O, Yousaf S, Tsai J, Palmer K, Riazuddin S, Ahmed ZM. Delineation of Novel  
533 Compound Heterozygous Variants in LTBP2 Associated with Juvenile Open Angle  
534 Glaucoma. *Genes (Basel).* 2018;9(11). doi:10.3390/genes9110527.
- 535 43. Somarajan BI, Gupta S, Mahalingam K, Azmira K, Gupta V. Digenic Inheritance in  
536 Juvenile Open-Angle Glaucoma. *J Pediatr Genet;(EFirst).*
- 537 44. Medina-Trillo C, Sánchez-Sánchez F, Aroca-Aguilar J-D, et al. Hypo- and hypermorphic  
538 FOXC1 mutations in dominant glaucoma: transactivation and phenotypic variability.  
539 *PLoS One.* 2015; 10(3):e0119272. doi:10.1371/journal.pone.0119272.
- 540

541

542

543 **Legends:**

544 Fig 1: Work flow used in deep learning of anterior segment SD OCT images.

545 Fig 2: Anterior segment SD OCT image showing the iridocorneal angle area (green  
546 rectangle) and the trabecular meshwork area (yellow rectangle).

547 Fig 3: Receiver operating characteristic (ROC) curves for the three Deep Learning models  
548 using external validation dataset. \*AUROC= Area under ROC curve, TM =Trabecular  
549 meshwork, ICA = Iridocorneal angle

550 Fig 4: Anterior segment SD OCT images of patients with a) *MYOC* p.Gly367Arg showing  
551 intense hyper reflectivity at the TM, b) *MYOC* p.Gln48His showing intense hyper reflectivity  
552 at the TM with absent SC, c) *CYP1B1* p.Asn519ser showing intense hyper reflectivity at the  
553 TM with absent SC, d) *CYP1B1* p.Tyr81Asn showing absent SC, e) *FOXC1*  
554 p.Gly418Alafs\*27 showing intense hyper reflectivity at the TM( White arrow) with presence  
555 of SC ( Black arrows), f) *LTBP2* p.Pro229Thr showing intense hyper reflectivity at the TM  
556 with absent SC.

557 Supplementary Fig 1: Flow chart of the analysis of anterior segment SD-OCT image

558

559

560 **Table1: Demographic and clinical details of subjects whose ASOCT B-scans (1 B-scan**  
561 **image per eye, n = 340) were used for machine learning model preparation.**

562

563

564

| Characteristics                               | PCG            | JOAG           | POAG           | Normal (Control) |
|-----------------------------------------------|----------------|----------------|----------------|------------------|
| Number of subjects                            | 16             | 62             | 37             | 85               |
| Number of eyes                                | 27             | 86             | 57             | 170              |
| Laterality                                    |                |                |                |                  |
| • Bilateral                                   | 11             | 24             | 20             | 85               |
| • Unilateral                                  | 5              | 38             | 17             | 0                |
| Gender                                        |                |                |                |                  |
| • Male                                        | 5 (31.25%)     | 44 (71%)       | 25 (67.5%)     | 45 (53%)         |
| • Female                                      | 11 (68.75%)    | 18 (29%)       | 12 (32.5%)     | 40 (47%)         |
| IOP mmHg at the time of study (Mean $\pm$ SD) | 14.2 $\pm$ 1.4 | 13.8 $\pm$ 1.2 | 15.1 $\pm$ 1.3 | 16.2 $\pm$ 0.8   |

565

566 ASOCT – Anterior Segment Optical Coherence tomography, IOP – Intraocular pressure

567

568 **Table 2: Comparison between the model prediction and expert's decision**

569

570

571

|                | <b>M1</b> | <b>M2</b> | <b>M3</b> | <b>Final consensus-based prediction</b> |
|----------------|-----------|-----------|-----------|-----------------------------------------|
| <b>Expert1</b> | 80.82%    | 79.45%    | 80.82%    | 83.56%                                  |
| <b>Expert2</b> | 67.12%    | 79.45%    | 78%       | 72.6%                                   |

572

573

574

575 **Table 3: Showing Cohen's  $\kappa$  test results determining the agreement between the experts**  
576 **and model prediction ( $p < 0.05$  was considered significant)**

577

|                                           | Value | Asymptomatic standard error <sup>a</sup> | Approximate significance |
|-------------------------------------------|-------|------------------------------------------|--------------------------|
| <b>Expert1/Consensus-based prediction</b> |       |                                          |                          |
| Measurement of agreement Kappa            | 0.619 | 0.099                                    | 0.00                     |
| Number of valid cases                     | 73    |                                          |                          |
| <b>Expert2/Consensus-based prediction</b> |       |                                          |                          |
| Measurement of agreement Kappa            | 0.230 | 0.117                                    | 0.027                    |
| Number of valid cases                     | 73    |                                          |                          |
| <b>Expert1/Expert2</b>                    |       |                                          |                          |
| Measurement of agreement Kappa            | 0.417 | 0.109                                    |                          |
| Number of valid cases                     | 73    |                                          | 0.000                    |

578

579

a. Not assuming the null hypothesis.

580

581

582 **Table 4 : Genetic mutations among 30 patients and angle dysgenesis on ASOCT as**  
 583 **determined by AI consensus.**

| Gene( number of patients) | Mutation                                   | South Asian MAF | Percentage scans with angle dysgenesis predicted by AI | 584<br>585<br>586<br>587<br>588<br>589<br>590<br>591<br>592<br>593<br>594<br>595<br>596<br>597<br>598<br>599<br>600<br>601<br>602<br>603<br>604<br>605<br>606<br>607<br>608<br>609<br>610<br>611<br>612<br>613<br>614<br>615<br>616<br>617<br>618 | MAF= Minor Allele Frequency, ASOCT=Anterior segment Optical coherence tomography, AI= Artificial intelligence |
|---------------------------|--------------------------------------------|-----------------|--------------------------------------------------------|---------------------------------------------------------------------------------------------------------------------------------------------------------------------------------------------------------------------------------------------------|---------------------------------------------------------------------------------------------------------------|
| <i>MYOC</i> (1)           | p.Pro481Thr                                | NA              | 88                                                     |                                                                                                                                                                                                                                                   |                                                                                                               |
| <i>MYOC</i> (2)           | p.Lys423Gln                                | NA              | 90                                                     |                                                                                                                                                                                                                                                   |                                                                                                               |
| <i>MYOC</i> (2)           | p.Thr377Lys                                | NA              | 68                                                     |                                                                                                                                                                                                                                                   |                                                                                                               |
| <i>MYOC</i> (3)           | p.Pro370Leuc                               | 0               | 95                                                     |                                                                                                                                                                                                                                                   |                                                                                                               |
| <i>MYOC</i> (4)           | p.Gly367Arg                                | 0               | 60                                                     |                                                                                                                                                                                                                                                   |                                                                                                               |
| <i>MYOC</i> (3)           | p.Gln337Arg                                | 0               | 70                                                     |                                                                                                                                                                                                                                                   |                                                                                                               |
| <i>MYOC</i> (1)           | p.Gln48His                                 | 0.009           | 95                                                     |                                                                                                                                                                                                                                                   |                                                                                                               |
| <i>CYP1B1</i> (1)         | p.Asn519ser                                | 0               | 100                                                    |                                                                                                                                                                                                                                                   |                                                                                                               |
| <i>CYP1B1</i> (3)         | p.Arg368His                                | 0.01            | 95                                                     |                                                                                                                                                                                                                                                   |                                                                                                               |
| <i>CYP1B1</i> (1)         | Frameshift(p.Pro321Ser <sup>*</sup> 104)   | NA              | 90                                                     |                                                                                                                                                                                                                                                   |                                                                                                               |
| <i>CYP1B1</i> (3)         | p.Glu229Lys                                | 0.04            | 80                                                     |                                                                                                                                                                                                                                                   |                                                                                                               |
| <i>CYP1B1</i> (1)         | p.Pro193leu                                | 0.01            | 75                                                     |                                                                                                                                                                                                                                                   |                                                                                                               |
| <i>CYP1B1</i> (1)         | p.Tyr81Asn                                 | 0               | 94                                                     |                                                                                                                                                                                                                                                   |                                                                                                               |
| <i>FOXCI</i> (2)          | Frameshift( p.Gly418Alafs <sup>*</sup> 27) | NA              | 80                                                     |                                                                                                                                                                                                                                                   |                                                                                                               |
| <i>LTBP2</i> (1)          | Frameshift(p.Val801Hisfs <sup>*</sup> 18)  | NA              | 100                                                    |                                                                                                                                                                                                                                                   |                                                                                                               |
| <i>LTBP2</i> (1)          | p.Pro229Thr                                | 0               | 100                                                    |                                                                                                                                                                                                                                                   |                                                                                                               |

619 **s:**  
 620 VG, DG, SB conceptualized the study, analyzed and prepared the manuscript. SB developed  
 621 the deep learning models. VG and BIS conducted the genetic studies and bio informatics.  
 622 VG, SG, AS, KM and TV conducted patient recruitment and clinical studies. DG and MG  
 623 reviewed and modified the final version.  
 624  
 625

**Author contribution**

626

627

**SD-OCT Scans**  
(PCG, JOAG, POAG patients  
& normal controls)

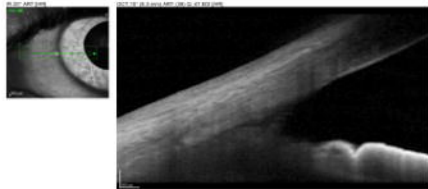

**Image processing** (cropping in two ways)

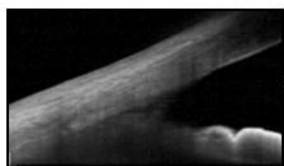

Raw OCT images  
(B-scans)

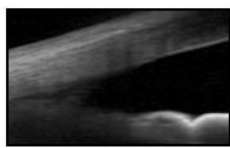

Input images for  
Model-1  
(ICA area)

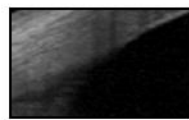

Input images for  
Model-2 & 3  
(TM area)

**Re-annotation (by experts)**

**23 types of augmentations using CLoDSA**

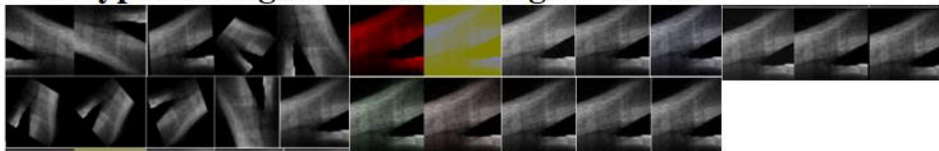

**Model Generation** (MATLAB R2021a)

Transfer learning (19 algorithms- SqueezeNet, ResNet-18, GoogleNet, ResNet-50, DarkNet-53, DarkNet-19, ShuffleNet, NasnetMobile, Nasnet Large, Xception, Place-365-Google, Mobilenet V2, DenseNet-201, Inception-Resnet V2, Inception-V3, ResNet-101, VGG-19, VGG-16, AlexNet)

**Validation studies**

- Independent external dataset prediction accuracy
- Comparison of model prediction with molecular screening outcome establishing genotype-phenotype correlation
- Comparison of Model prediction with Human experts

**Consensus based results from the three best prediction models**

**Model-1**  
(ICA images)

*Inception-Resnet V2*

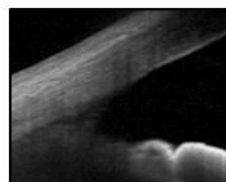

**Model-2**  
(TM images)

*Inception-Resnet V2*

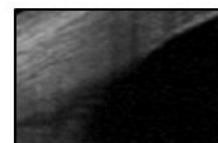

**Model-3**  
(TM images)

*Mobilenet V2*

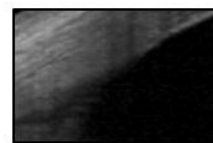



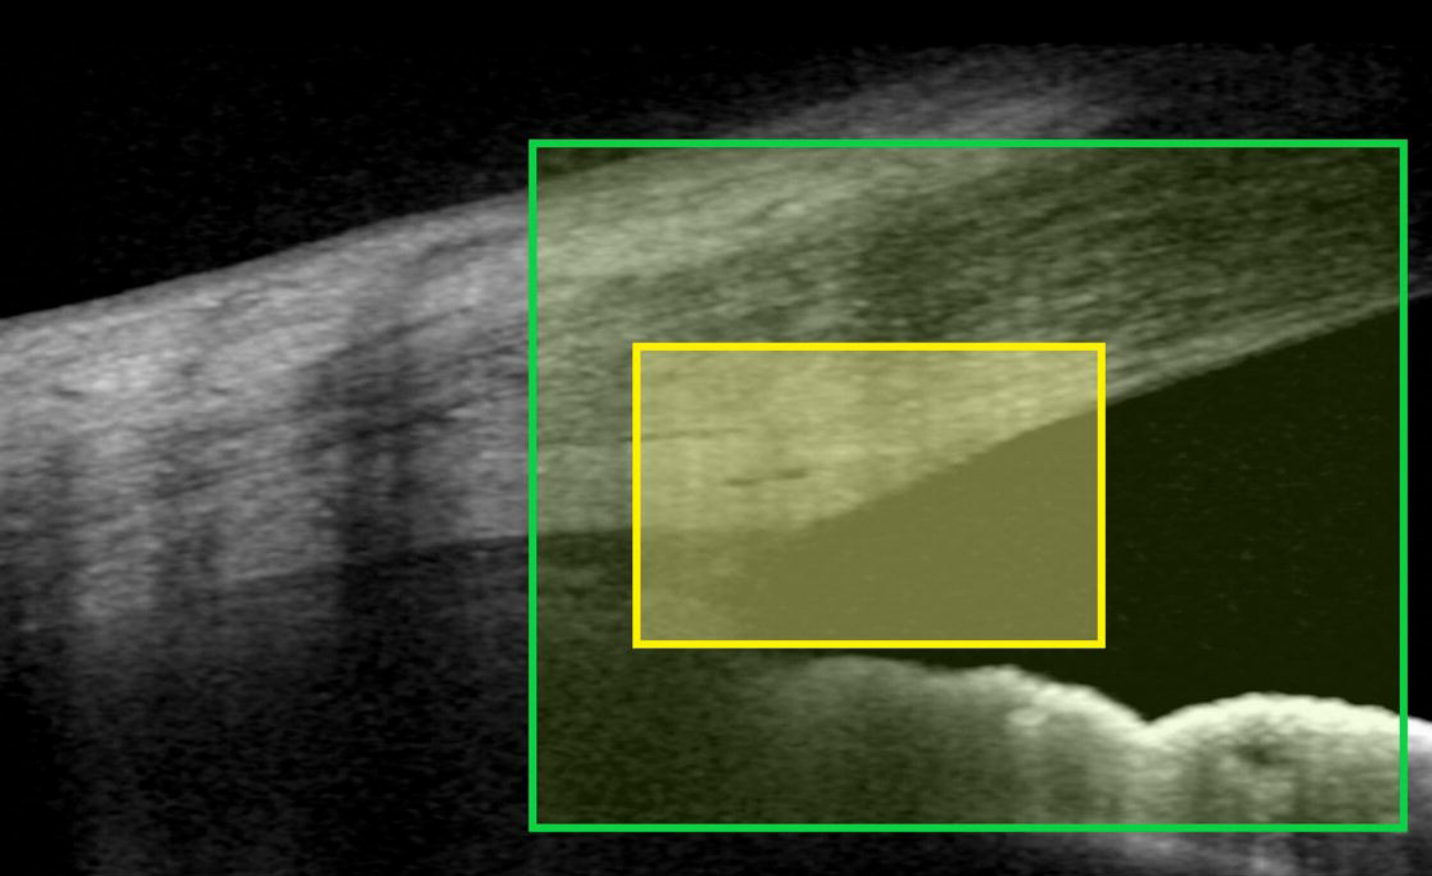

200  $\mu\text{m}$

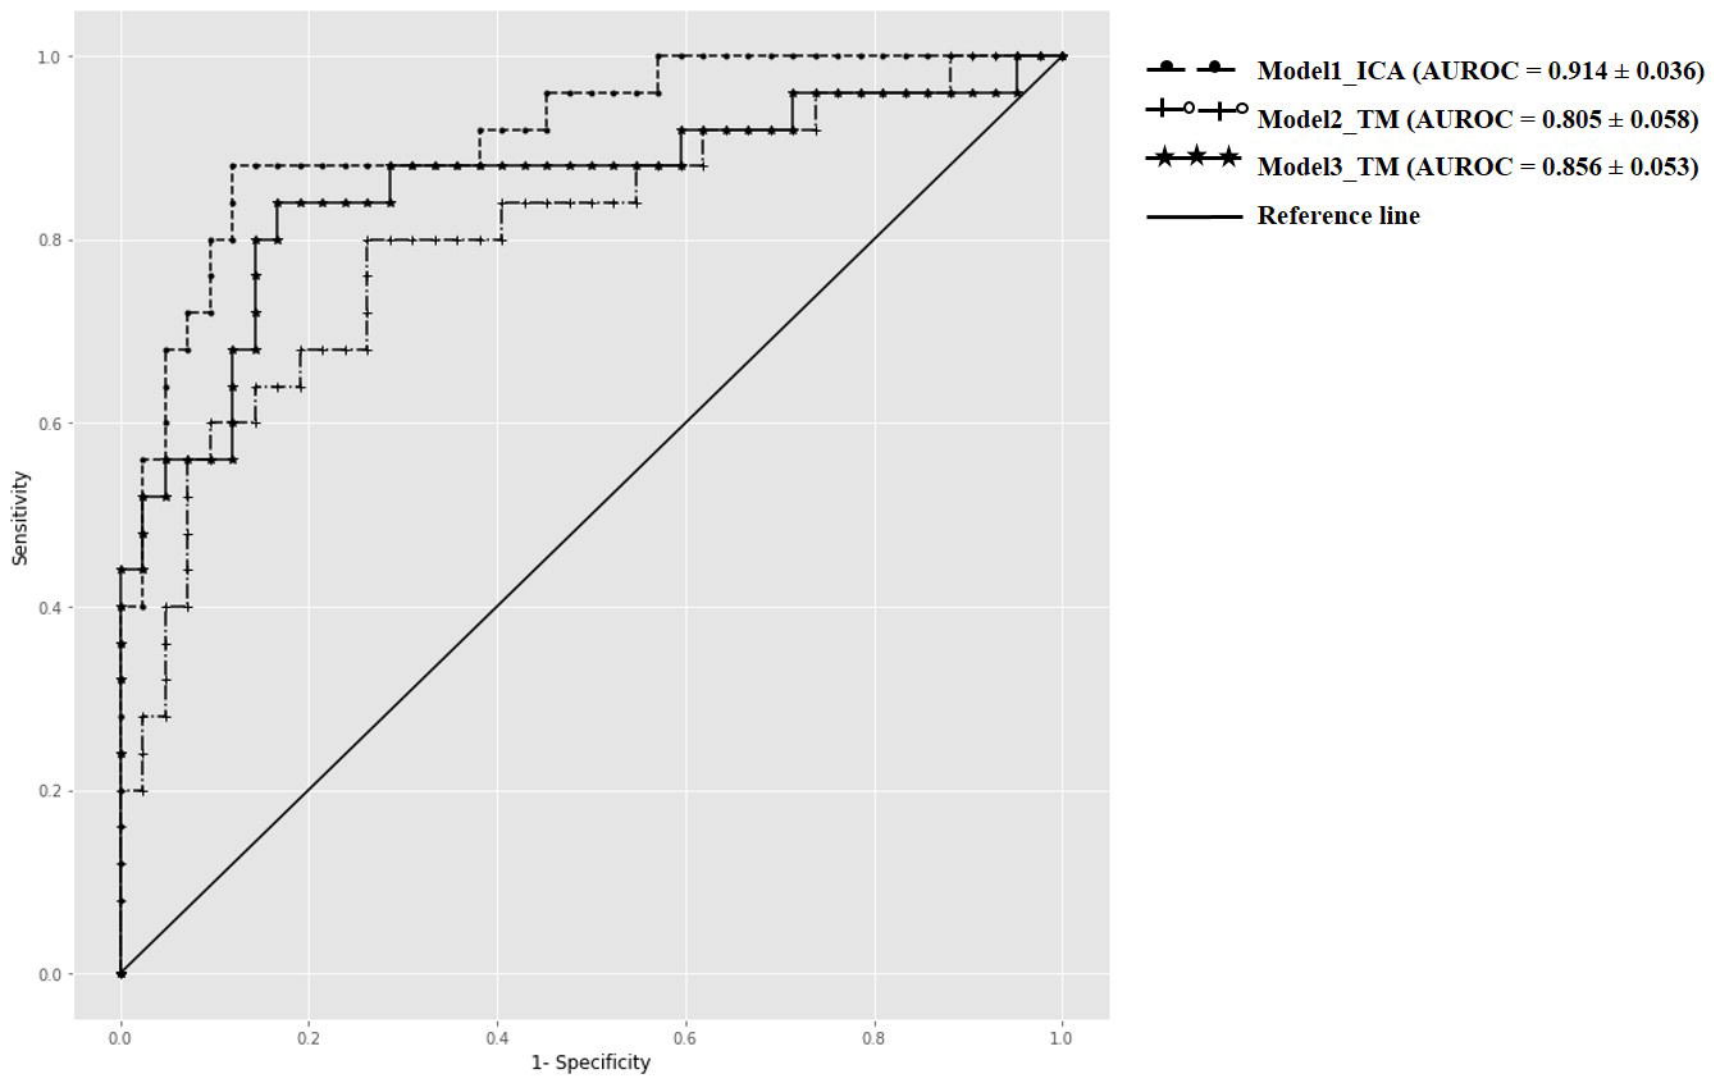

4a)

*MYOC*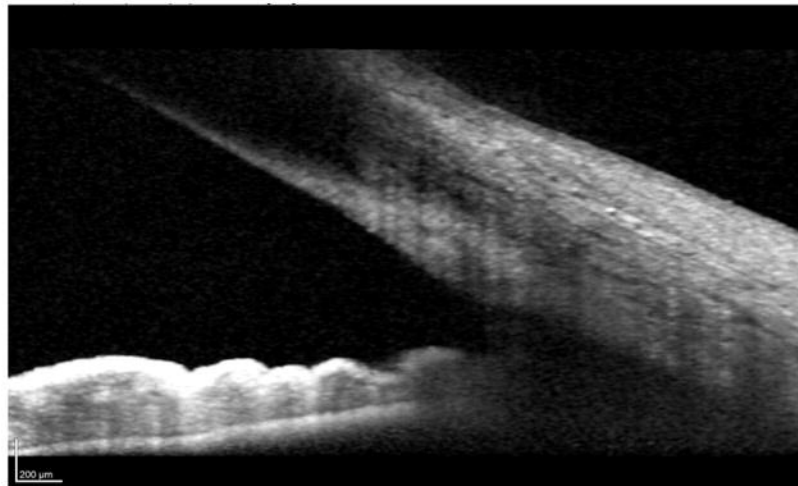

4b)

*MYOC*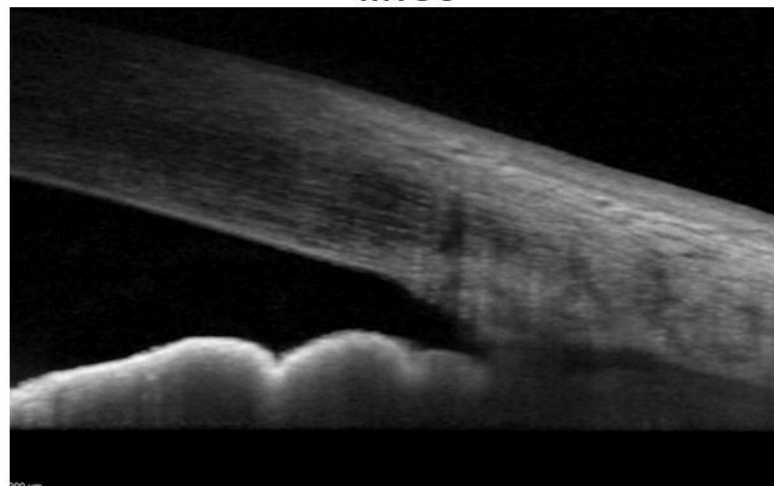

4c)

*CYP1B1*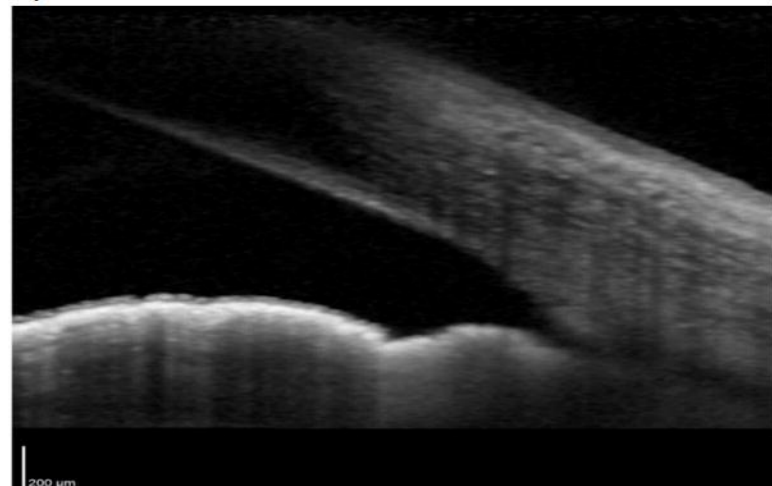

4d)

*CYP1B1*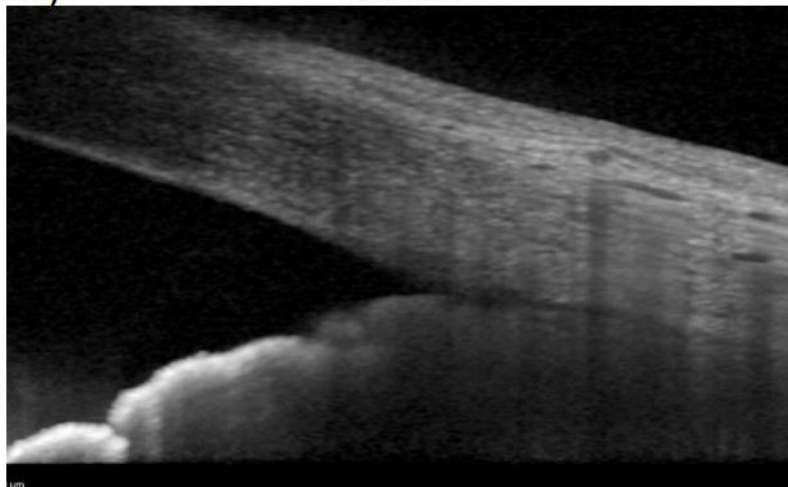

4e)

*FOXC1*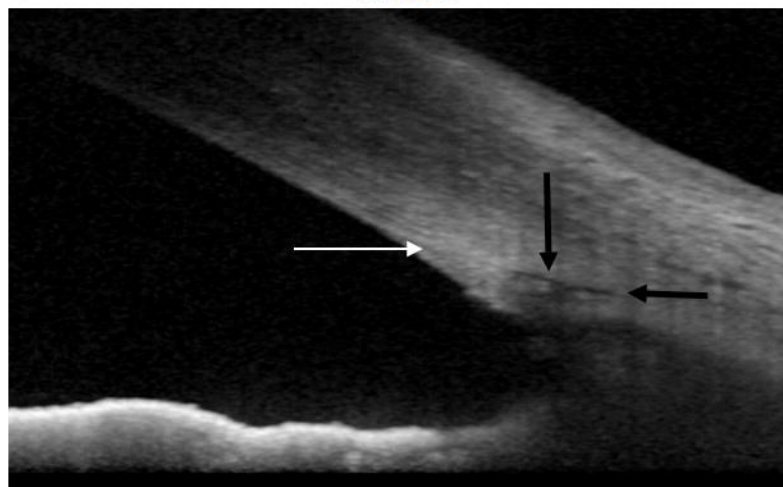

4f)

*LTBP2*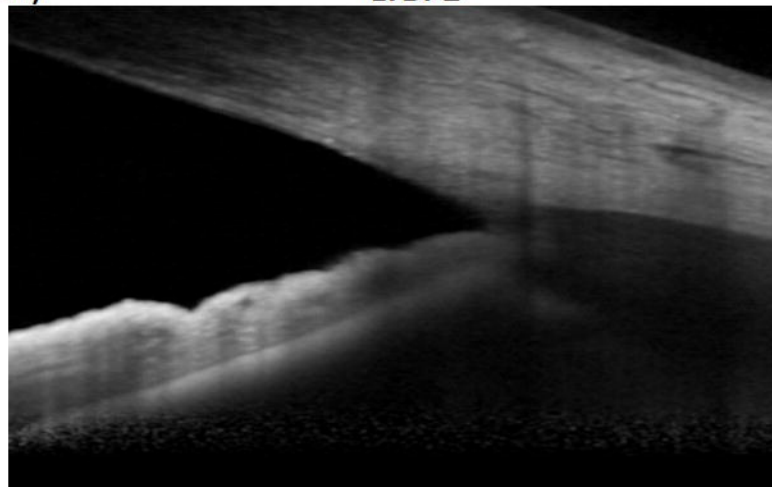

Source: https://medrxiv.org/content/10.1101/2021.12.18.21267894v1.full.pdf
